# Supplementary material for: Extensive coronavirus-induced membrane rearrangements are not a determinant of pathogenicity
Source: PubMed Central journal article supplement (PMC4891661; doi:10.1038/srep27126), 2016-06-03
Supplement: srep27126-s1.pdf [file srep27126-s1.pdf]

## Supplementary Figures

### **Extensive coronavirus-induced membrane rearrangements are not a determinant of pathogenicity**

Helena J. Maier<sup>1\*</sup>, Benjamin W. Neuman<sup>2</sup>, Erica Bickerton<sup>1</sup>, Sarah M. Keep<sup>1</sup>, Hasan Alrashedi<sup>2</sup>, Ross H. Hall<sup>1</sup> and Paul Britton<sup>1#</sup>

<sup>1</sup>The Pirbright Institute, Pirbright, Surrey, UK; <sup>2</sup>School of Biological Sciences, University of Reading, Reading, Berkshire, UK

<sup>#</sup>now retired

\*Address correspondence to Helena J. Maier [helena.maier@pirbright.ac.uk](mailto:helena.maier@pirbright.ac.uk)

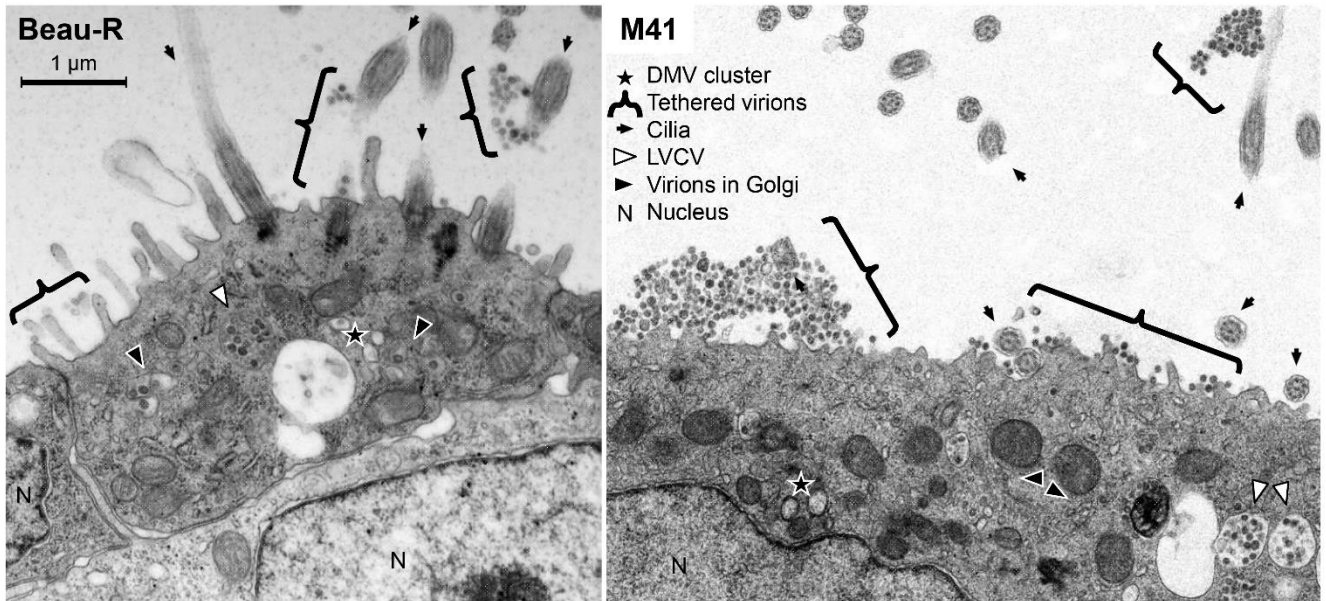

**Supplementary Figure S1. Overview of markers of virus infection.** Tracheal organ culture (TOCs) infected with Beau-R or M41. After 24 hrs, TOCs were fixed and imaged by TEM. Cells were imaged on a low magnification to indicate the extent of markers of virus infection.
